# Supplementary material for: Chelation as a strategy to reinforce cationic copper surface protection in acidic solutions
Source: Royal Society of Chemistry journal article supplement (doi:10.1039/c6ra09322a), 2016-01-01
Supplement: c6ra09322a1.pdf [file c6ra09322a1.pdf]

## **Supporting Information**

### **Chelation as a Strategy to Reinforce Cationic Copper Surface Protection in Acidic Solutions**

Liang Cai,<sup>1</sup> Xue-Qing Feng,<sup>1</sup> Xin Hua, Xiao-Peng He,\* Yi-Tao Long and Guo-Rong Chen\*

*Key Laboratory for Advanced Materials & Institute of Fine Chemicals, School of Chemistry and  
Molecular Engineering, East China University of Science and Technology, 130 Meilong Rd,  
Shanghai 200237, PR China*

*<sup>1</sup>Equal Contribution*

#### **Corresponding Authors.**

[xphe@ecust.edu.cn](mailto:xphe@ecust.edu.cn) (X.-P. He)

[mrs\\_guorongchen@ecust.ac.cn](mailto:mrs_guorongchen@ecust.ac.cn) (G.-R. Chen)

#### **Contents list**

S1. Additional Figures

S2. Additional Tables

## S1. Additional Figures

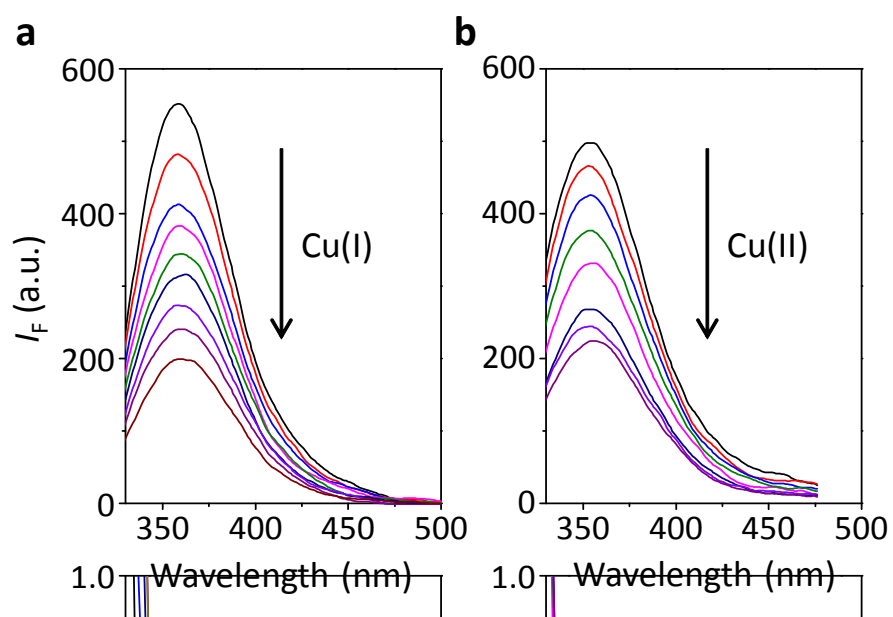

**Figure S1.** Fluorescence titration of **BT11** ( $1.5 \times 10^{-6}$  M) in the presence of increasing (a) Cu(I) (30-270  $\mu$ M) and (b) Cu(II) (30-270  $\mu$ M) in a mixed solution of 1 M HCl/DMSO (1:1, v/v) with an excitation wavelength of 282 nm.

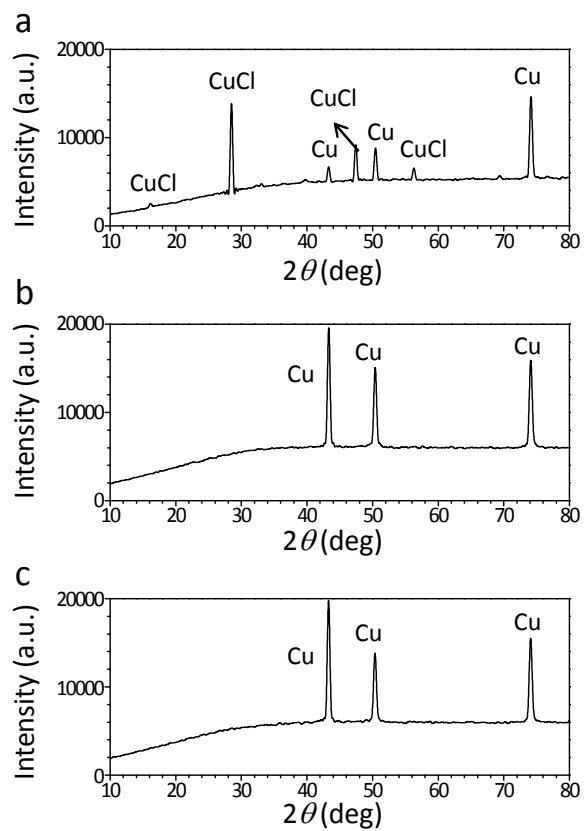

**Figure S2.** X-Ray Diffraction (XRD) of copper (Cu) surface after immersion in 1 M HCl for 3 days in the absence (a) and presence (b) of  $3.2 \times 10^{-4}$  M **BTII**, and (c) bare copper surface.

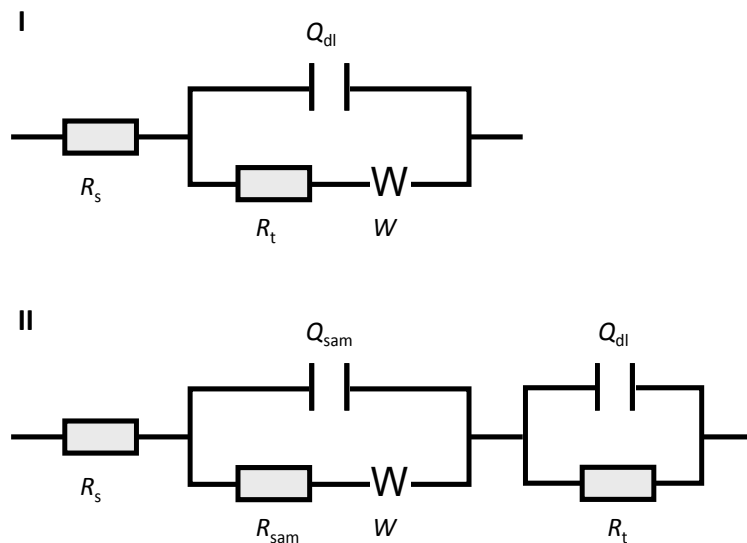

**Figure S3.** Equivalent circuit models used to fit the obtained electrochemical impedance spectroscopy (EIS) data, where  $R_s$  is the solution resistance,  $R_t$  the charge transfer resistance corresponding to the corrosion reaction at the copper/solution interface,  $R_{sam}$  the polarization resistance of transfer resistance of electrons through the protective molecular layer (if any) on copper surface,  $W$  the Warburg impedance,  $L$  the inductance,  $Q_{dl}$  the constant phase elements as a surrogate for the double-layer capacitance, and  $Q_{sam}$  the capacitance of the molecular film formed on copper.

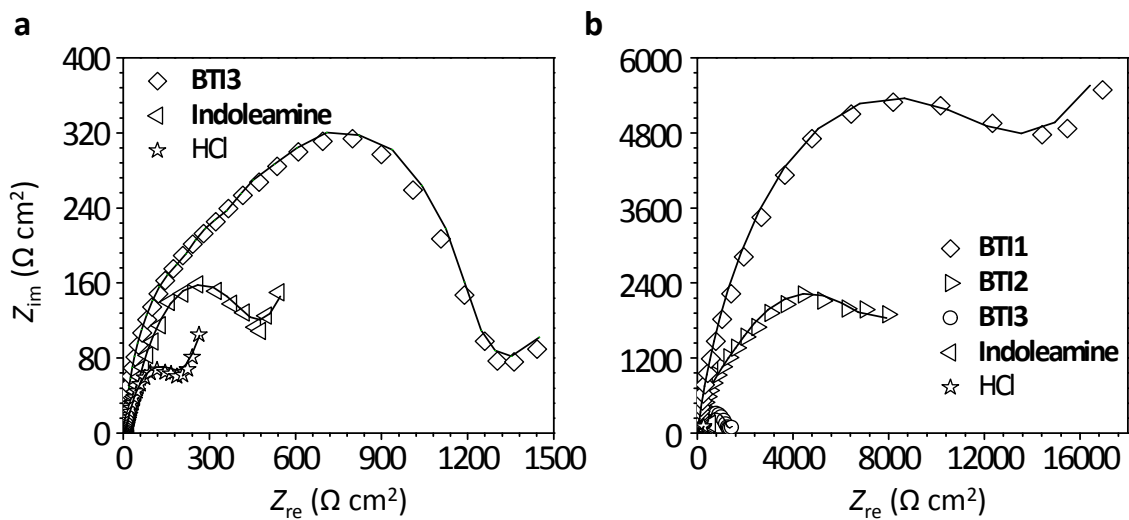

**Figure S4.** The experimental (dots) and fitted (line) Nyquist (a, b) plots for copper in 1 M HCl in the absence or presence of different corrosion inhibitors ( $10^{-3}$  M). Note that Fig. a is an enlarged area of the high frequency of Fig. b.

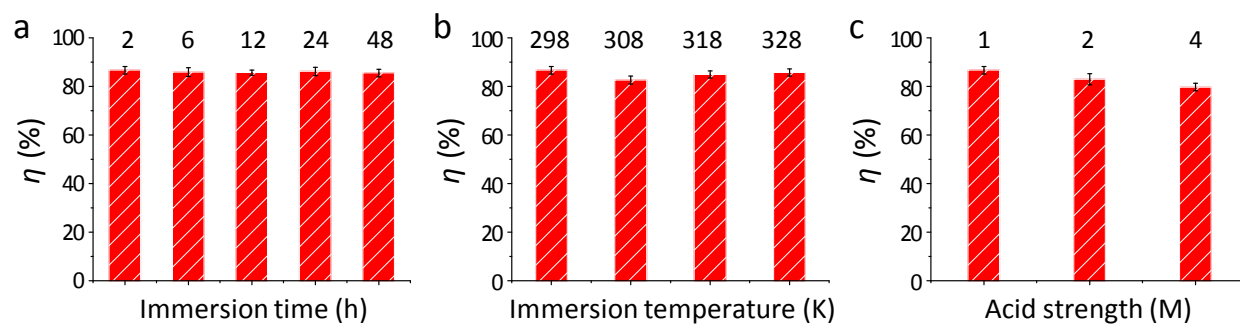

**Figure S5.** Histograms (determined by EIS) depicting the corrosion inhibitive efficiency ( $\eta$ ) of **BTI1** ( $10^{-3}$  M) for copper in HNO<sub>3</sub> under different conditions. (a) Increasing immersion time. (b) Increasing temperature. (c) Increasing HNO<sub>3</sub> concentration.

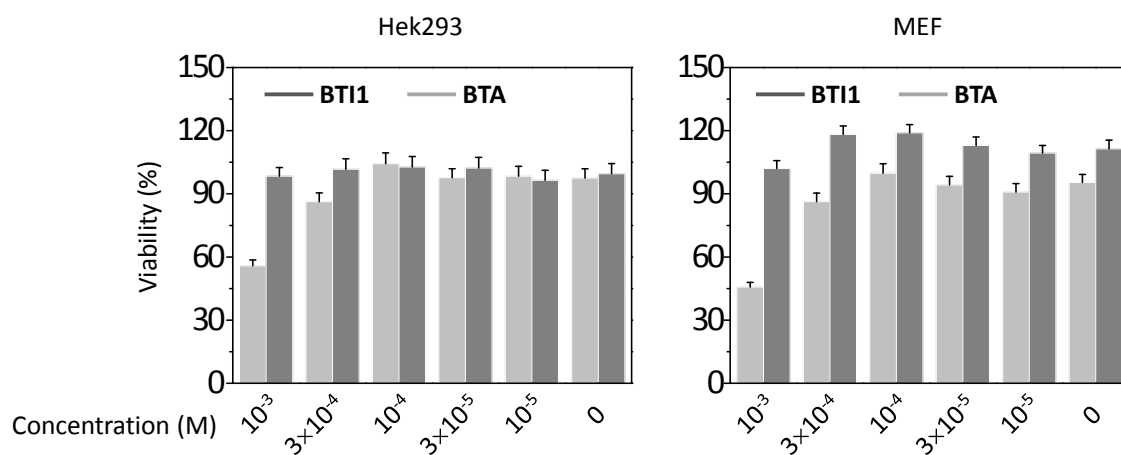

**Figure S6.** Cell viability of two healthy cell lines, Hek293 (human kidney cell line) and MEF (Mouse Embryonic Fibroblast cell line), after treatment with **BT11** or **BTA** with different concentrations for 72 h, determined by a typical MTS cell viability assay (for a reference, see: *Chem. Sci.*, 2016, 7, 4004).

## S2. Additional Tables

**Table S1.** Parameters obtained from polarization and isothermal analyses for copper in 1 M HCl in the absence (blank) or presence of **BTII** with different concentrations at 25 °C

| Medium          | 1 M HCl              | $E_{\text{corr}}$ (mV vs. SCE) | $-\beta_c$ (mV dec <sup>-1</sup> ) | $\beta_a$ (mV dec <sup>-1</sup> ) | $i_{\text{corr}}$ ( $\mu\text{A cm}^{-2}$ ) | $\eta$ (%)        |
|-----------------|----------------------|--------------------------------|------------------------------------|-----------------------------------|---------------------------------------------|-------------------|
|                 | blank                | -251.8                         | 296.9                              | 65.4                              | 20.2                                        | n.a. <sup>a</sup> |
|                 | $1.0 \times 10^{-5}$ | -233.1                         | 193.6                              | 59.6                              | 2.1                                         | 89.6              |
| <b>BTII</b> (M) | $3.2 \times 10^{-5}$ | -231.5                         | 191.3                              | 73.4                              | 2.0                                         | 90.1              |
|                 | $1.0 \times 10^{-4}$ | -247.4                         | 192.7                              | 79.4                              | 1.7                                         | 91.6              |
|                 | $3.2 \times 10^{-4}$ | -242.1                         | 196.2                              | 84.9                              | 1.5                                         | 92.6              |
|                 | $1.0 \times 10^{-3}$ | -259.6                         | 228.4                              | 87.1                              | 1.2                                         | 94.1              |
|                 | blank                | -201.3                         | 60.9                               | 110.1                             | 14.1                                        | n.a.              |
|                 | $1.0 \times 10^{-5}$ | -209.0                         | n.a.                               | 75.9                              | 9.7                                         | 31                |
| <b>BTA</b> (M)  | $3.2 \times 10^{-5}$ | -213.8                         | 58.6                               | 150.3                             | 9.7                                         | 31.2              |
|                 | $1.0 \times 10^{-4}$ | -221.1                         | 56.3                               | 180.4                             | 9.3                                         | 34.2              |
|                 | $3.2 \times 10^{-4}$ | -223.2                         | 51.9                               | 210.6                             | 8.8                                         | 37.3              |
|                 | $1.0 \times 10^{-3}$ | -225.2                         | 50.1                               | 278.3                             | 7.8                                         | 41.8              |

<sup>a</sup> n.a. means not available.



**Table S2.** EIS parameters fitted for copper in 1 M HCl in the absence (blank) and presence of inhibitor with different concentrations at 25 °C

| Compd.                   | Conc.<br>(M)         | OCP<br>(V) | $R_s$<br>( $\Omega$ cm <sup>2</sup> ) | $Q_{\text{sam}}$<br>( $\mu\text{F}$ cm <sup>-2</sup> ) | $n_1$ | $R_{\text{sam}}$<br>( $\Omega$ cm <sup>2</sup> ) | $W$<br>(m $\Omega^{-1}$ cm <sup>-2</sup> s <sup>1/2</sup> ) | $Q_{\text{dl}}$<br>( $\mu\text{F}$ cm <sup>-2</sup> ) | $n_2$ | $R_t$<br>( $\Omega$ cm <sup>2</sup> ) | $\eta$<br>(%) |
|--------------------------|----------------------|------------|---------------------------------------|--------------------------------------------------------|-------|--------------------------------------------------|-------------------------------------------------------------|-------------------------------------------------------|-------|---------------------------------------|---------------|
| <b>BTI1</b> (in 1 M HCl) | 0                    | -0.203     | 1.7                                   | n.a. <sup>a</sup>                                      | 0.7   | n.a.                                             | 52.7                                                        | 2522                                                  | n.a.  | 174.8                                 | n.a.          |
|                          | $1.0 \times 10^{-3}$ | -0.263     | 2.9                                   | 55.50                                                  | 0.8   | 11.40                                            | 0.50                                                        | 13.60                                                 | 0.9   | 13090                                 | 98.7          |
|                          | $3.2 \times 10^{-4}$ | -0.251     | 1.4                                   | 62.30                                                  | 0.8   | 2049                                             | 1.80                                                        | 137.5                                                 | 0.7   | 8673.0                                | 98.4          |
|                          | $1.0 \times 10^{-4}$ | -0.235     | 1.7                                   | 28.30                                                  | 0.8   | 3809                                             | 3.00                                                        | 162.5                                                 | 0.8   | 3361.0                                | 97.6          |
|                          | $3.2 \times 10^{-5}$ | -0.220     | 1.8                                   | 15.80                                                  | 0.8   | 807.3                                            | 2.40                                                        | 111.4                                                 | 0.8   | 2458.0                                | 94.7          |
|                          | $1.0 \times 10^{-5}$ | -0.206     | 2.3                                   | 20.30                                                  | 0.8   | 532.8                                            | 5.70                                                        | 132.3                                                 | 0.8   | 1539.0                                | 91.6          |
| <b>BTA</b> (in 1 M HCl)  | 0                    | 0.015      | 1.8                                   | n.a.                                                   | 0.8   | n.a.                                             | 14.8                                                        | 348.0                                                 | n.a.  | 62.7                                  | n.a.          |
|                          | $1.0 \times 10^{-3}$ | -0.212     | 2.3                                   | 778.1                                                  | 0.7   | 29.80                                            | 18.7                                                        | 1428                                                  | 0.7   | 304.0                                 | 42.5          |
|                          | $3.0 \times 10^{-4}$ | -0.265     | 1.9                                   | 679.8                                                  | 0.8   | 2145                                             | 0.70                                                        | 1567                                                  | 0.8   | 277.9                                 | 36.4          |
|                          | $1.0 \times 10^{-4}$ | -0.178     | 2.0                                   | 657.7                                                  | 0.9   | 1120                                             | 1.30                                                        | 1879                                                  | 0.9   | 263                                   | 33.5          |
|                          | $3.0 \times 10^{-5}$ | -0.198     | 1.8                                   | 698.4                                                  | 0.7   | 908.5                                            | 1.80                                                        | 2012                                                  | 0.7   | 247                                   | 29.3          |
| <b>BTI2</b> (in 1 M HCl) | $1.0 \times 10^{-5}$ | -0.217     | 1.7                                   | 701.4                                                  | 0.8   | 1345                                             | 3.40                                                        | 2133                                                  | 0.8   | 234                                   | 25.6          |
|                          | 0                    | -0.203     | 1.7                                   | n.a. <sup>a</sup>                                      | 0.7   | n.a.                                             | 52.7                                                        | 2522                                                  | n.a.  | 174.8                                 | n.a.          |
|                          | $1.0 \times 10^{-3}$ | -0.217     | 3.6                                   | 62.7                                                   | 0.9   | 743.7                                            | 2.60                                                        | 143.1                                                 | 0.7   | 8226                                  | 98.1          |
| <b>BTI3</b> (in 1 M HCl) | 0                    | -0.203     | 1.7                                   | n.a. <sup>a</sup>                                      | 0.7   | n.a.                                             | 52.7                                                        | 2522                                                  | n.a.  | 174.8                                 | n.a.          |
|                          | $1.0 \times 10^{-3}$ | -0.234     | 2.3                                   | 29.6                                                   | 0.9   | 277.5                                            | 18.3                                                        | 225.6                                                 | 0.8   | 1306                                  | 86.2          |

<sup>a</sup> n.a. means not available.

**Table S3.** EIS parameters fitted for copper in HCl in the absence (blank) and presence of inhibitor with different conditions

| Compd.                            | Conc.<br>(M)         | OCP<br>(V) | $R_s$<br>( $\Omega \text{ cm}^2$ ) | $Q_{\text{sam}}$<br>( $\mu\text{F cm}^{-2}$ ) | $n_1$ | $R_{\text{sam}}$<br>( $\Omega \text{ cm}^2$ ) | $W$<br>( $\text{m}\Omega^{-1} \text{ cm}^{-2} \text{ s}^{1/2}$ ) | $Q_{\text{dl}}$<br>( $\mu\text{F cm}^{-2}$ ) | $n_2$ | $R_t$<br>( $\Omega \text{ cm}^2$ ) | $\eta$<br>(%) |
|-----------------------------------|----------------------|------------|------------------------------------|-----------------------------------------------|-------|-----------------------------------------------|------------------------------------------------------------------|----------------------------------------------|-------|------------------------------------|---------------|
| <b>BT11</b> (in 1 M HCl)          | 0                    | -0.203     | 1.7                                | n.a. <sup>a</sup>                             | 0.7   | n.a.                                          | 52.7                                                             | 2522                                         | n.a.  | 174.8                              | n.a.          |
|                                   | $3.2 \times 10^{-4}$ | -0.251     | 1.4                                | 62.30                                         | 0.8   | 2049                                          | 1.80                                                             | 137.5                                        | 0.7   | 8673.0                             | 98.4          |
| <b>BT11</b> (in 2 M HCl)          | 0                    | -0.246     | 1.1                                | n.a. <sup>a</sup>                             | 0.8   | n.a.                                          | 58.5                                                             | 2255                                         | n.a.  | 68.1                               | n.a.          |
|                                   | $3.2 \times 10^{-4}$ | -0.176     | 0.8                                | 408.3                                         | 0.6   | 47.3                                          | 2.10                                                             | 2061                                         | 0.6   | 1364                               | 95.2          |
| <b>BT11</b> (in 4 M HCl)          | 0                    | -0.333     | 0.9                                | n.a.                                          | 0.8   | n.a.                                          | 79.9                                                             | 2097                                         | n.a.  | 61.0                               | n.a.          |
|                                   | $3.2 \times 10^{-4}$ | -0.217     | 1.2                                | 981.5                                         | 0.6   | 2.9                                           | 1.30                                                             | 1277                                         | 0.7   | 857.1                              | 92.9          |
| <b>BTA</b> (in 1 M HCl)           | 0                    | 0.015      | 1.8                                | n.a.                                          | 0.8   | n.a.                                          | 14.8                                                             | 348.0                                        | n.a.  | 62.7                               | n.a.          |
|                                   | $3.2 \times 10^{-4}$ | -0.265     | 2.1                                | 567.1                                         | 0.7   | 28.9                                          | 18.7                                                             | 1428                                         | 0.7   | 265.1                              | 40.6          |
| <b>BTA</b> (in 2 M HCl)           | 0                    | -0.215     | 1.8                                | n.a.                                          | 0.7   | n.a.                                          | 17.8                                                             | 332.0                                        | n.a.  | 112.0                              | n.a.          |
|                                   | $3.2 \times 10^{-4}$ | -0.214     | 1.3                                | 465.6                                         | 0.9   | 36.8                                          | 34.7                                                             | 363.0                                        | 0.8   | 230.4                              | 36.9.         |
| <b>BTA</b> (in 4 M HCl)           | 0                    | -0.241     | 1.4                                | n.a.                                          | 0.8   | n.a.                                          | 71.6                                                             | 2258                                         | n.a.  | 130.2                              | n.a.          |
|                                   | $3.2 \times 10^{-4}$ | -0.202     | 1.3                                | 423.6                                         | 0.9   | 32.4                                          | 34.7                                                             | 363.0                                        | 0.8   | 244.0                              | 32.7.         |
| <b>BT11</b> (in 1 M HCl for 2 h)  | 0                    | -0.203     | 1.7                                | n.a. <sup>a</sup>                             | 0.7   | n.a.                                          | 52.7                                                             | 2522                                         | n.a.  | 174.8                              | n.a.          |
|                                   | $3.2 \times 10^{-4}$ | -0.251     | 1.4                                | 62.30                                         | 0.8   | 2049                                          | 1.80                                                             | 137.5                                        | 0.7   | 8673.0                             | 98.4          |
| <b>BT11</b> (in 1 M HCl for 6 h)  | 0                    | -0.194     | 1.2                                | n.a.                                          | 0.8   | n.a.                                          | 30.1                                                             | 2240                                         | n.a.  | 128.4                              | n.a.          |
|                                   | $3.2 \times 10^{-4}$ | -0.126     | 1.8                                | 85.10                                         | 0.8   | 548.3                                         | 5.50                                                             | 35.1                                         | 0.8   | 1429                               | 93.5          |
| <b>BT11</b> (in 1 M HCl for 12 h) | 0                    | -0.175     | 2.3                                | n.a.                                          | 0.8   | n.a.                                          | 78.4                                                             | 2273                                         | n.a.  | 65.80                              | n.a.          |
|                                   | $3.2 \times 10^{-4}$ | -0.101     | 1.5                                | 35.90                                         | 0.8   | 335.6                                         | 3.10                                                             | 44.3                                         | 0.7   | 1434                               | 96.3          |
| <b>BT11</b> (in 1 M HCl for 24 h) | 0                    | -0.131     | 2.1                                | n.a.                                          | 0.8   | n.a.                                          | 111.3                                                            | 2213                                         | n.a.  | 32.70                              | n.a.          |
|                                   | $3.2 \times 10^{-4}$ | -0.086     | 2.5                                | 27.50                                         | 0.9   | 471.1                                         | 1.90                                                             | 118.1                                        | 0.8   | 1077                               | 97.8          |
| <b>BT11</b> (in 1 M HCl for 48 h) | 0                    | -0.072     | 3.6                                | n.a.                                          | 0.8   | n.a.                                          | 407.1                                                            | 1987                                         | n.a.  | 23.10                              | n.a.          |
|                                   | $3.2 \times 10^{-4}$ | -0.043     | 1.9                                | 46.70                                         | 0.9   | 28.9                                          | 1.30                                                             | 80.1                                         | 0.7   | 700.9                              | 96.8          |
| <b>BT11</b> (in 1 M HCl at 298 K) | 0                    | -0.203     | 1.7                                | n.a. <sup>a</sup>                             | 0.7   | n.a.                                          | 52.7                                                             | 2522                                         | n.a.  | 174.8                              | n.a.          |
|                                   | $3.2 \times 10^{-4}$ | -0.251     | 1.4                                | 62.30                                         | 0.8   | 2049                                          | 1.80                                                             | 137.5                                        | 0.7   | 8673.0                             | 98.4          |
| <b>BT11</b> (in 1 M HCl at 308 K) | 0                    | -0.201     | 1.7                                | n.a.                                          | 0.8   | n.a.                                          | 21.4                                                             | 2538                                         | n.a.  | 157.4                              | n.a.          |

|                                   |                      |        |     |       |     |       |      |       |      |       |       |
|-----------------------------------|----------------------|--------|-----|-------|-----|-------|------|-------|------|-------|-------|
|                                   | $3.2 \times 10^{-4}$ | -0.236 | 1.7 | 26.10 | 0.8 | 3831  | 3.10 | 217.7 | 0.8  | 3146  | 97.7  |
| <b>BTII</b> (in 1 M HCl at 318 K) | 0                    | -0.209 | 1.6 | n.a.  | 0.8 | n.a.  | 19.3 | 1938  | n.a. | 136.7 | n.a.  |
|                                   | $3.2 \times 10^{-4}$ | -0.202 | 1.4 | 24.30 | 0.8 | 361.6 | 2.60 | 103   | 0.8  | 1541  | 92.8  |
| <b>BTII</b> (in 1 M HCl at 328 K) | 0                    | -0.195 | 1.5 | n.a.  | 0.8 | n.a.  | 26.8 | 2064  | n.a. | 125.7 | n.a.  |
|                                   | $3.2 \times 10^{-4}$ | -0.198 | 2.6 | 27.50 | 0.9 | 421.1 | 9.10 | 198.1 | 0.8  | 1077  | 91.6  |
| <b>BTA</b> (in 1 M HCl at 298 K)  | 0                    | -0.241 | 8.2 | 180.5 | 0.8 | 219.1 | 2.3  | 813.2 | 0.7  | 1168  | n.a.  |
|                                   | $3.2 \times 10^{-4}$ | -0.265 | 2.1 | 567.1 | 0.7 | 28.9  | 18.7 | 1428  | 0.7  | 265.1 | 40.6  |
| <b>BTA</b> (in 1 M HCl at 308 K)  | 0                    | -0.117 | 5.6 | 230.9 | 0.8 | 223.8 | 1.9  | 765.9 | 0.8  | 1787  | n.a.  |
|                                   | $3.2 \times 10^{-4}$ | -0.211 | 1.6 | 234.7 | 0.8 | 31.6  | 19.2 | 2134  | 0.7  | 259.4 | 39.8  |
| <b>BTA</b> (in 1 M HCl at 318 K)  | 0                    | -0.154 | 6.7 | 189.5 | 0.7 | 312.7 | 1.9  | 778.4 | 0.8  | 1567  | n.a.  |
|                                   | $3.2 \times 10^{-4}$ | -0.116 | 1.9 | 209.8 | 0.8 | 34.6  | 24.7 | 2371  | 0.7  | 246.4 | 37.75 |
| <b>BTA</b> (in 1 M HCl at 328 K)  | 0                    | -0.181 | 3.9 | 210.7 | 0.8 | 267.4 | 2.6  | 788.5 | 0.7  | 1765  | n.a.  |
|                                   | $3.2 \times 10^{-4}$ | -0.132 | 2.0 | 231.6 | 0.7 | 34.5  | 22.3 | 2431  | 0.8  | 233.5 | 35.15 |
| <b>BTA</b> (in 1 M HCl for 2 h)   | 0                    | -0.015 | 1.8 | n.a.  | 0.8 | n.a.  | 14.8 | 348.0 | n.a. | 62.7  | n.a.  |
|                                   | $3.2 \times 10^{-4}$ | -0.265 | 2.1 | 567.1 | 0.7 | 28.9  | 18.7 | 1428  | 0.7  | 275.1 | 42.1  |
| <b>BTA</b> (in 1 M HCl for 6 h)   | 0                    | -0.165 | 2.3 | n.a.  | 0.7 | n.a.  | 15.6 | 278.0 | n.a. | 43.6  | n.a.  |
|                                   | $3.2 \times 10^{-4}$ | -0.211 | 1.8 | 358.7 | 0.7 | 23.4  | 23.4 | 2016  | 0.8  | 260.6 | 37.2  |
| <b>BTA</b> (in 1 M HCl for 12 h)  | 0                    | -0.115 | 3.4 | n.a.  | 0.9 | n.a.  | 20.9 | 245.7 | n.a. | 76.8  | n.a.  |
|                                   | $3.2 \times 10^{-4}$ | -0.243 | 2.3 | 647.3 | 0.8 | 33.8  | 23.6 | 2351  | 0.6  | 228.2 | 33.5  |
| <b>BTA</b> (in 1 M HCl for 24 h)  | 0                    | -1.135 | 2.1 | n.a.  | 0.7 | n.a.  | 21.2 | 231.5 | n.a. | 56.3  | n.a.  |
|                                   | $3.2 \times 10^{-4}$ | -0.245 | 1.1 | 465.1 | 0.8 | 34.6  | 19.8 | 1567  | 0.7  | 213.4 | 29.1  |
| <b>BTA</b> (in 1 M HCl for 48 h)  | 0                    | -0.075 | 1.6 | n.a.  | 0.7 | n.a.  | 15.6 | 432.1 | n.a. | 56.9  | n.a.  |
|                                   | $3.2 \times 10^{-4}$ | -0.118 | 1.7 | 546.7 | 0.7 | 21.7  | 19.8 | 1546  | 0.8  | 216.3 | 25.5  |

<sup>a</sup> n.a. means not available.
